# Supplementary material for: BH3 Mimetics Augment Cytotoxic T Cell Killing of Acute Myeloid Leukemia via Mitochondrial Apoptotic Mechanism
Source: Research Square preprint supplement (doi:10.21203/rs.3.rs-5307127/v1), 2024-12-09
Supplement: Supplementary file 1 [file 4ac88b35a0f4508414db7293.docx]

**Supplementary File**

Western blot files for Figure 5B – full length uncropped western blot files

The membrane was scanned using an Odyssey CLx Imager (LI-COR Biosciences, Lincoln, NE) and normalized to the density of α-tubulin in the corresponding samples. Chameleon Duo Pre-stained Protein Ladder (LI-COR) was used as the ladder.

| **Antibody, species** | **Company** | **Catalog** |
| --- | --- | --- |
| Bax, rabbit | Cell Signaling Technology, Danvers, MA | 2772 |
| Bak, rabbit | Cell Signaling Technology | 12105 |
| Alpha-tubulin, mouse | Abcam, Cambridge, UK | ab7291 |
| anti-rabbit IgG, goat; DyLight 800 | Invitrogen/Thermo | SA5-10036 |
| anti-mouse IgG, goat; DyLight 680 | Invitrogen/Thermo | 35518 |

Columns (from left to right): ladder, SCR KO (scramble), BAX KO, BAK KO, BAX/BAK KO, ladder

Red bands only with exposure to see DyLight680 (excitation/emission max 676/705nm)


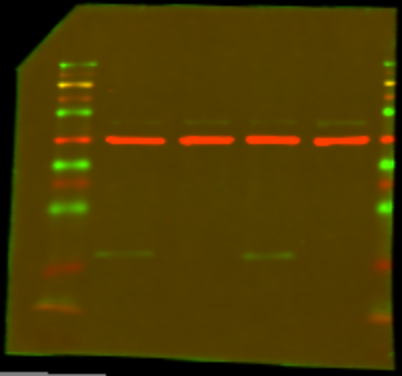

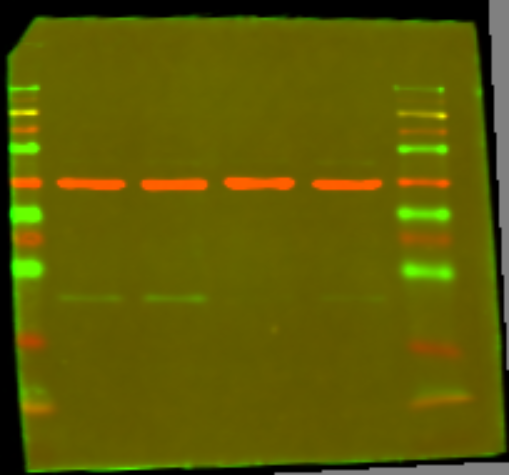
Green bands only with exposure to see DyLight800 (excitation/emission max 789/794nm)

BAX blot

BAK blot


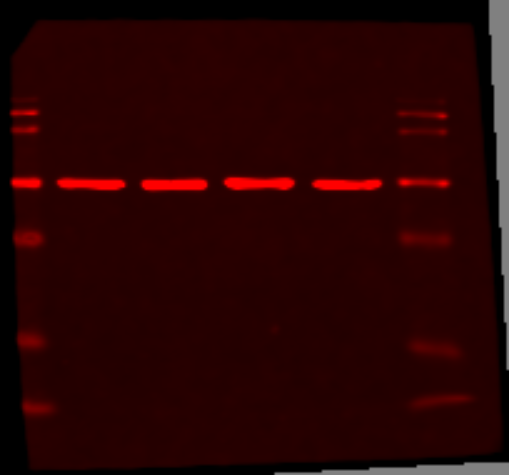

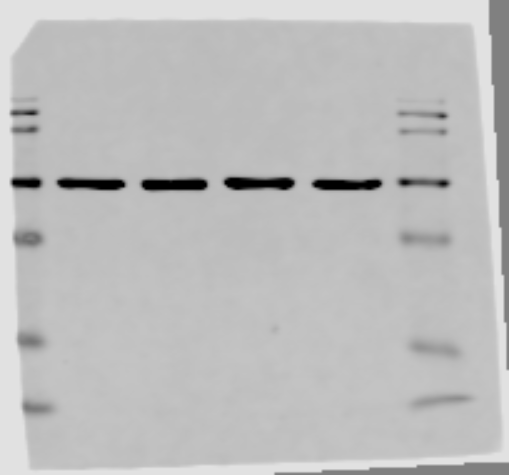

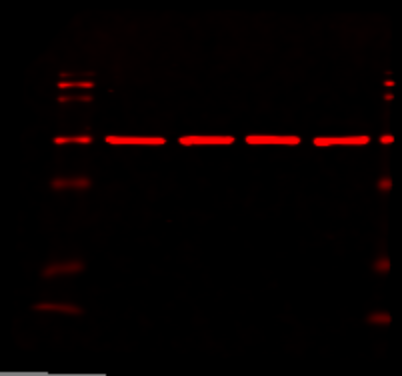

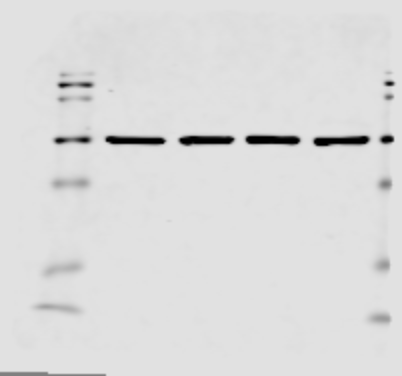

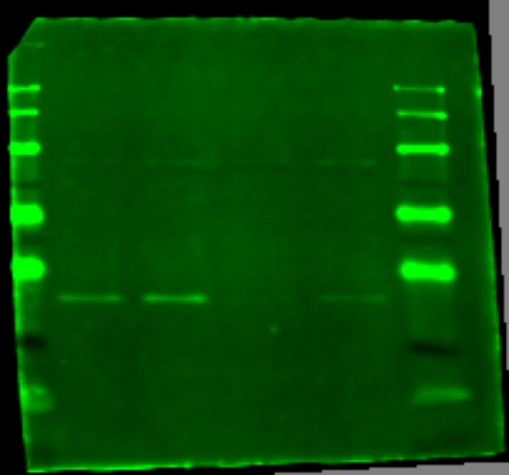

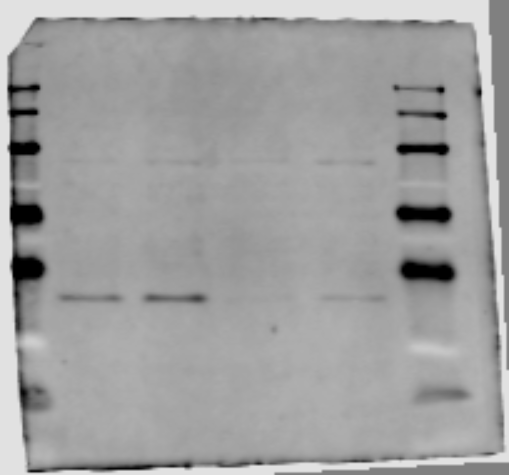

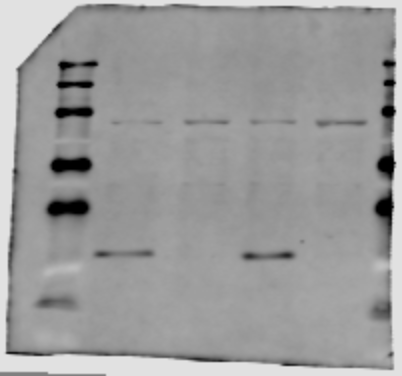

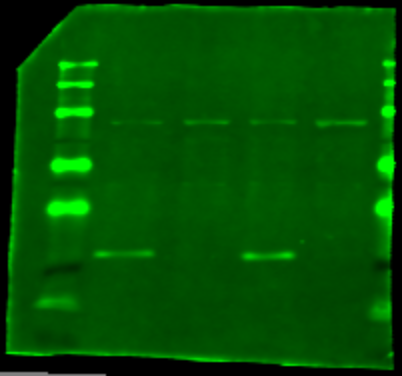


Green bands only

Green bands only

Red bands only

Red bands only
